# Supplementary material for: Association between postsurgical pain and heart rate variability: protocol for a scoping review
Source: HighWire-hosted journal article supplement (doi:10.1136/bmjopen-2020-044949), 2021-04-01
Supplement: bmjopen-2020-044949supp001_data_supplement.pdf [file bmjopen-2020-044949supp001_data_supplement.pdf]

## **Appendix 1: Search Strategy**

Database: Ovid MEDLINE(R), Ovid MEDLINE(R) Daily and Epub Ahead of Print, In-Process & Other Non-Indexed Citations <1946 to Present> Search Strategy:

- 
- 1 impaired heart rate\*.mp. (143)
  - 2 heart rate variability.mp. (18824)
  - 3 beat to beat.mp. (5415)
  - 4 interbeat interval\*.mp. (541)
  - 5 inter beat interval\*.mp. (211)
  - 6 r r interval\*.mp. (3672)
  - 7 hrv.mp. (11603)
  - 8 interbeat variability.mp. (7)
  - 9 inter beat variability.mp. (4)
  - 10 or/1-9 (27831)
  - 11 Pain, Postoperative/ (39337)
  - 12 (postoperative adj3 pain\*).mp. (53652)
  - 13 (post operative adj3 pain\*).mp. (3878)
  - 14 11 or 12 or 13 (55548)
  - 15 10 and 14 (37)
  - 16 after surgery.mp. (155261)
  - 17 post operative.mp. (61086)
  - 18 postoperative.mp. (797129)
  - 19 perioperative period/ (3223)
  - 20 anesthesia recovery period/ (5184)
  - 21 exp General Surgery/ (38830)
  - 22 surg\*.mp. (3150935)
  - 23 operation\*.mp. (506410)
  - 24 or/16-23 (3523635)
  - 25 pain\*.mp. (789689)
  - 26 exp Anti-Inflammatory Agents/ (507771)
  - 27 exp Anesthetics/ (243875)
  - 28 exp Anesthetics, Local/ (104541)
  - 29 exp Lidocaine/ (24430)
  - 30 exp Ketamine/ (12470)
  - 31 exp Pain/ (395623)
  - 32 Pain Management/ (34025)
  - 33 Pain Measurement/ (85945)
  - 34 or/25-33 (1545630)
  - 35 10 and 24 and 34 (242)
  - 36 15 or 35 (242)
  - 37 exp Cardiac Surgical Procedures/ (217850)
  - 38 36 not 37 (230)
